# Supplementary material for: Probing the effects of fructose concentration on the evolution of humins during fructose dehydration
Source: Royal Society of Chemistry journal article supplement (doi:10.1039/d2re00324d), 2022-10-11
Supplement: d2re00324d1.pdf [file d2re00324d1.pdf]

## - Supporting Information-

### **Probing the Effects of Fructose Concentration on the Evolution of Humins during Fructose Dehydration**

Yexin Hu, Hui Li, Ping Hu, Linzhen Li, Di Wu, Zhidan Xue, Liangfang Zhu,\* and  
Changwei Hu\*

*Key Laboratory of Green Chemistry and Technology, Ministry of Education, College of Chemistry, Sichuan University, Chengdu, Sichuan 610064, P. R. China.*

\*E-mail: [zhulf@scu.edu.cn](mailto:zhulf@scu.edu.cn) and [changweihu@scu.edu.cn](mailto:changweihu@scu.edu.cn); Fax: +86 28 85411105; Tel: +86 28 85411105.

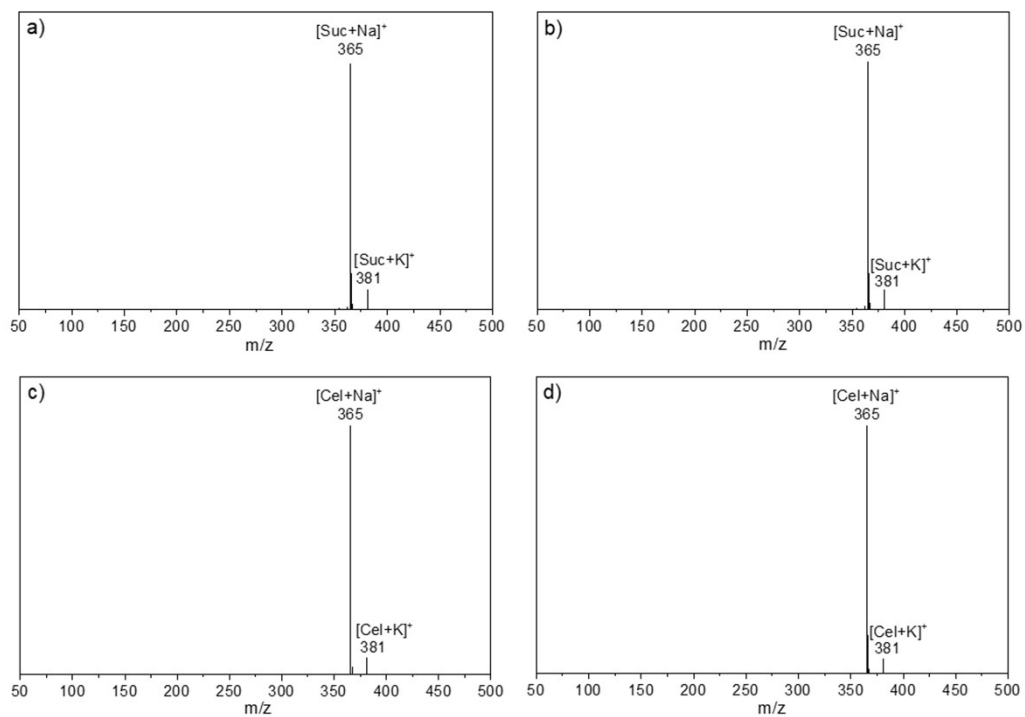

**Fig. S1** ESI-MS spectra of the aqueous solutions of a) 0.5 M sucrose, b) 2.0 M sucrose, c) 0.5 M cellobiose, and d) 2.0 M cellobiose.

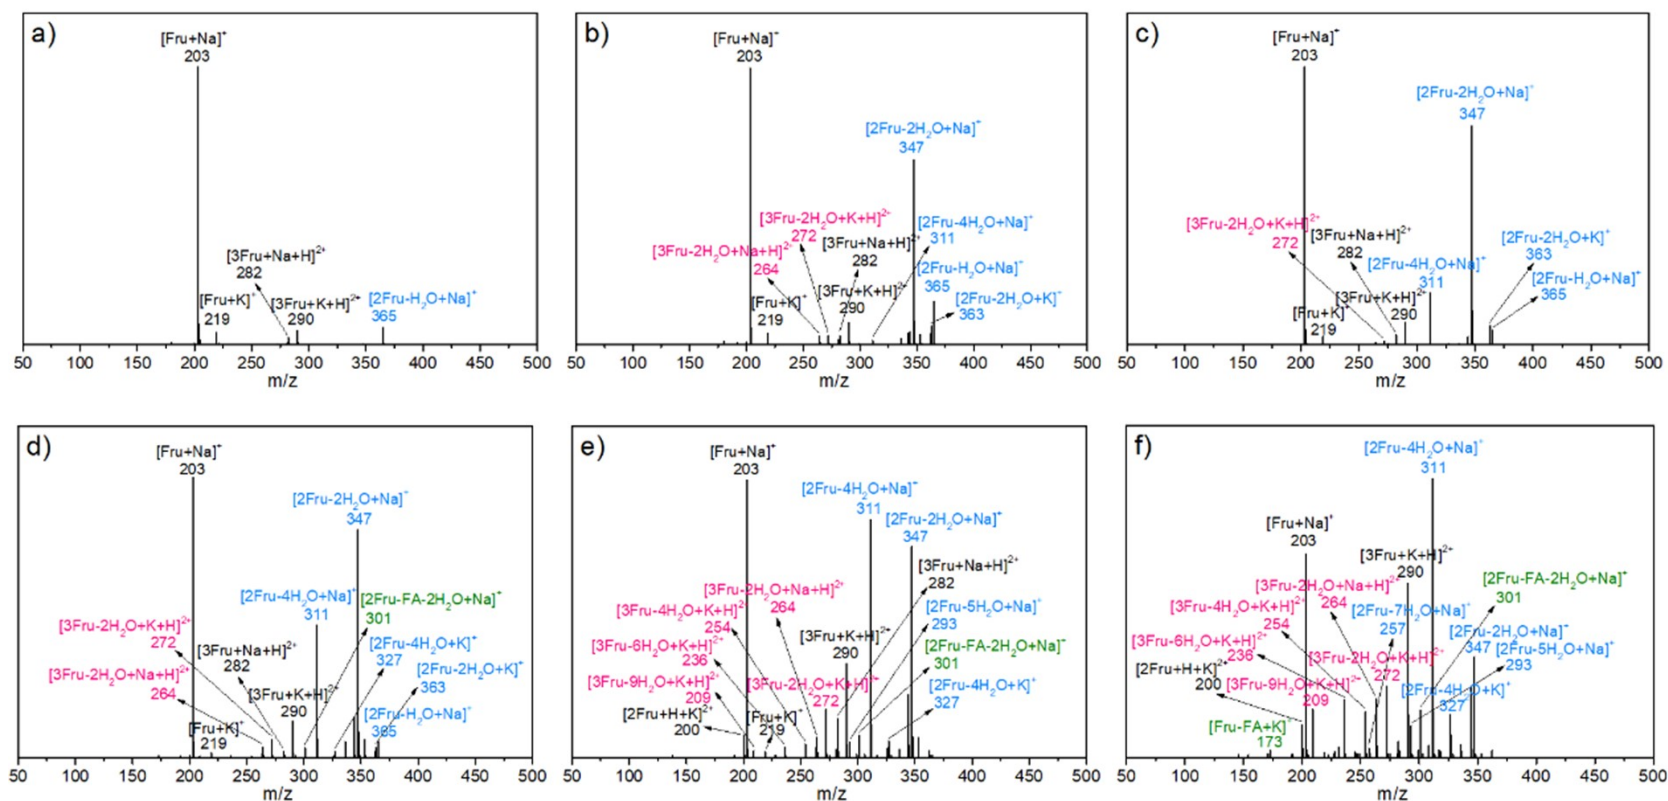

**Fig. S2** The ESI-MS spectra of the reaction mixture before (a) and after (b ~ f) reacting fructose (18.0 wt.%) at 140 °C for different reaction time. b) 15 min, c) 30 min, d) 60 min, e) 90 min, and f) 120 min. Note: the peak with m/z of 209 could also be assigned to  $[2\text{Fru}+\text{HMF}-6\text{H}_2\text{O}+\text{H}+\text{K}]^{2+}$ ,  $[\text{Fru}+2\text{HMF}-3\text{H}_2\text{O}+\text{H}+\text{K}]^{2+}$ , or  $[3\text{HMF}+\text{H}+\text{K}]^{2+}$ ; the peak with m/z of 236 could also be assigned to  $[2\text{Fru}+\text{HMF}-3\text{H}_2\text{O}+\text{H}+\text{K}]^{2+}$  or  $[\text{Fru}+2\text{HMF}+\text{H}+\text{K}]^{2+}$ ; the peak with m/z of 254 could also be assigned to  $[2\text{Fru}+\text{HMF}-\text{H}_2\text{O}+\text{H}+\text{K}]^{2+}$ ; the peak with m/z of 264 could also be assigned to  $[2\text{Fru}+\text{HMF}+\text{H}_2\text{O}+\text{H}+\text{Na}]^{2+}$ ; the peak with m/z of 272 could also be assigned to  $[2\text{Fru}+\text{HMF}+\text{H}_2\text{O}+\text{H}+\text{K}]^{2+}$ ; the peak with m/z of 301 could also be assigned to  $[2\text{Fru}-\text{FA}+\text{HMF}+\text{H}_2\text{O}+\text{Na}]^+$ .

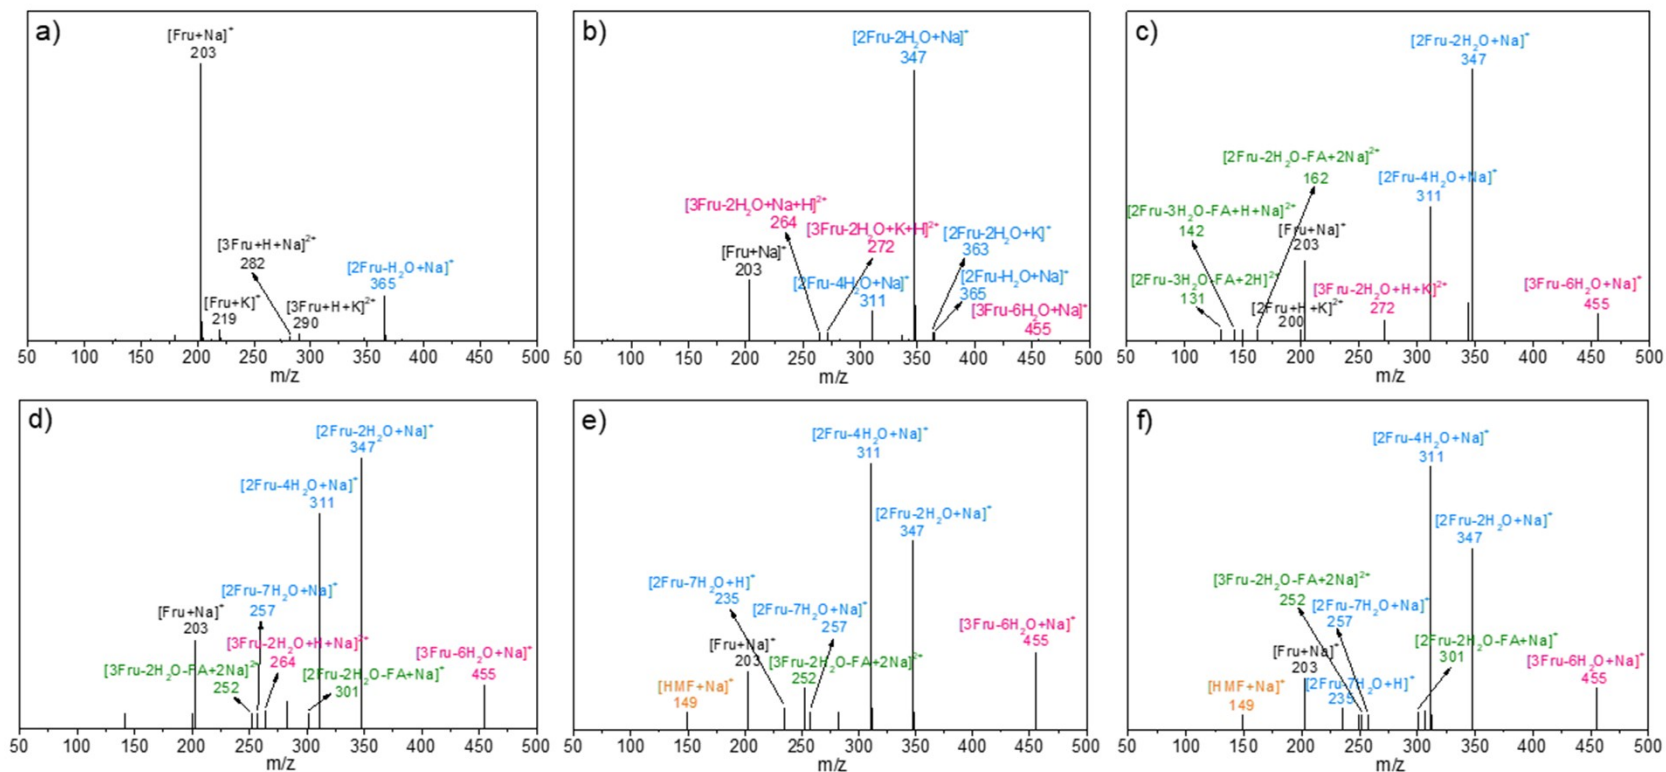

**Fig. S3** The ESI-MS spectra of the reaction mixture before (a) and after (b ~ f) reacting fructose (270.0 wt.%) at 140 °C for different reaction time. b) 15 min, c) 30 min, d) 60 min, e) 90 min, and f) 120 min. Note: the peak with m/z of 131 could also be assigned to [Fru-FA+HMF+2H]<sup>2+</sup>; the peak with m/z of 142 could also be assigned to [Fru-FA+HMF+H+Na]<sup>2+</sup>; the peak with m/z of 162 could also be assigned to [Fru-FA+HMF+H<sub>2</sub>O+2Na]<sup>2+</sup>; the peak with m/z of 252 could also be assigned to [2Fru-FA+HMF+H<sub>2</sub>O+2Na]<sup>2+</sup>; the peak with m/z of 264 could also be assigned to [2Fru+HMF+H<sub>2</sub>O+H+Na]<sup>2+</sup>; the peak with m/z of 272 could also be assigned to [2Fru+HMF+H<sub>2</sub>O+H+K]<sup>2+</sup>; the peak with m/z of 301 could also be assigned to [2Fru-FA+HMF+H<sub>2</sub>O+Na]<sup>+</sup>; the peak with m/z of 455 could also be assigned to [2Fru+HMF-3H<sub>2</sub>O+Na]<sup>+</sup> or [Fru+2HMF+Na]<sup>+</sup>.

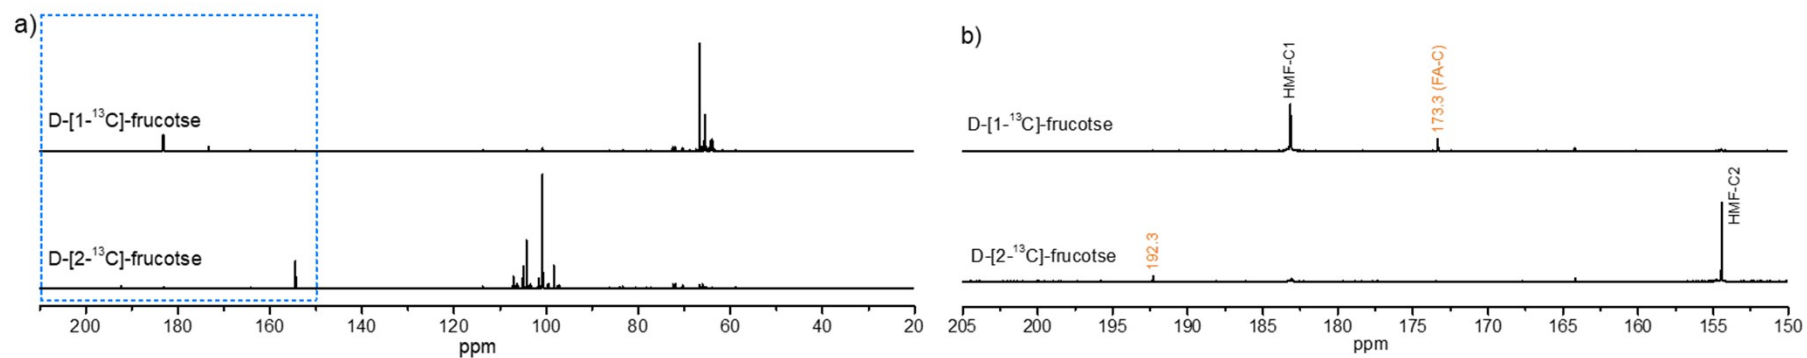

**Fig. S4**  $^{13}\text{C}$  NMR spectra of the reaction mixture after reacting fructose or isotopically labelled fructose at 140 °C for 0.5 h. Reaction conditions: 720 mg substrate, 1 mL  $\text{H}_2\text{O}$ , 0.05 M  $\text{H}_2\text{SO}_4$ , under a  $\text{N}_2$  atmosphere. b) represented the enlarged spectra in the dotted regions of a).

The peaks in the range of 60 ~ 110 ppm were assigned to isotope-labelled fructose (Fig. S4a). The peak at 173.3 ppm in Fig. 4b was ascribed to carbon of FA formed by the C1-C2 cleavage of D-[1- $^{13}\text{C}$ ]-fructose. The peak at 192.3 ppm was assigned to the C11 species formed by condensation of degradative D-[2- $^{13}\text{C}$ ]-fructose with another fructose molecule.

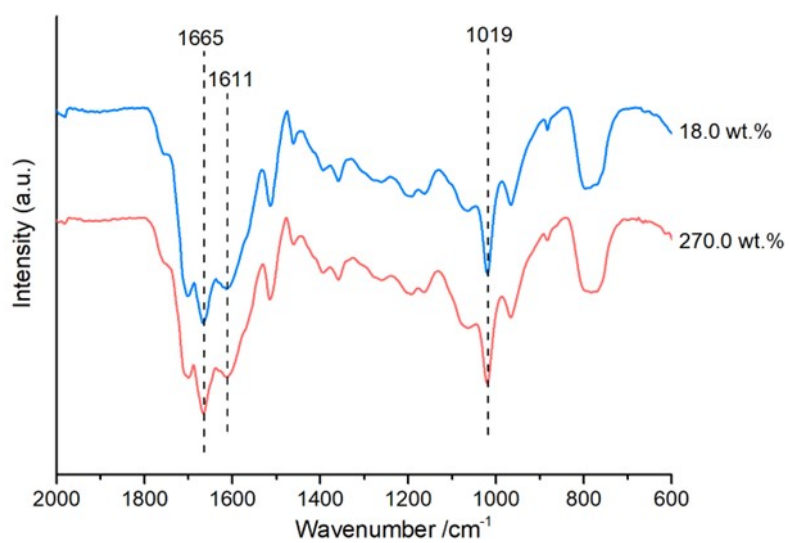

**Figure S5** FT-IR spectra of the solid humins obtained after reacting fructose with different concentrations for a long reaction time. Reaction conditions: 1 mL of H<sub>2</sub>O, 0.05 M of H<sub>2</sub>SO<sub>4</sub>, 140 °C, 2 h, under a N<sub>2</sub> atmosphere.

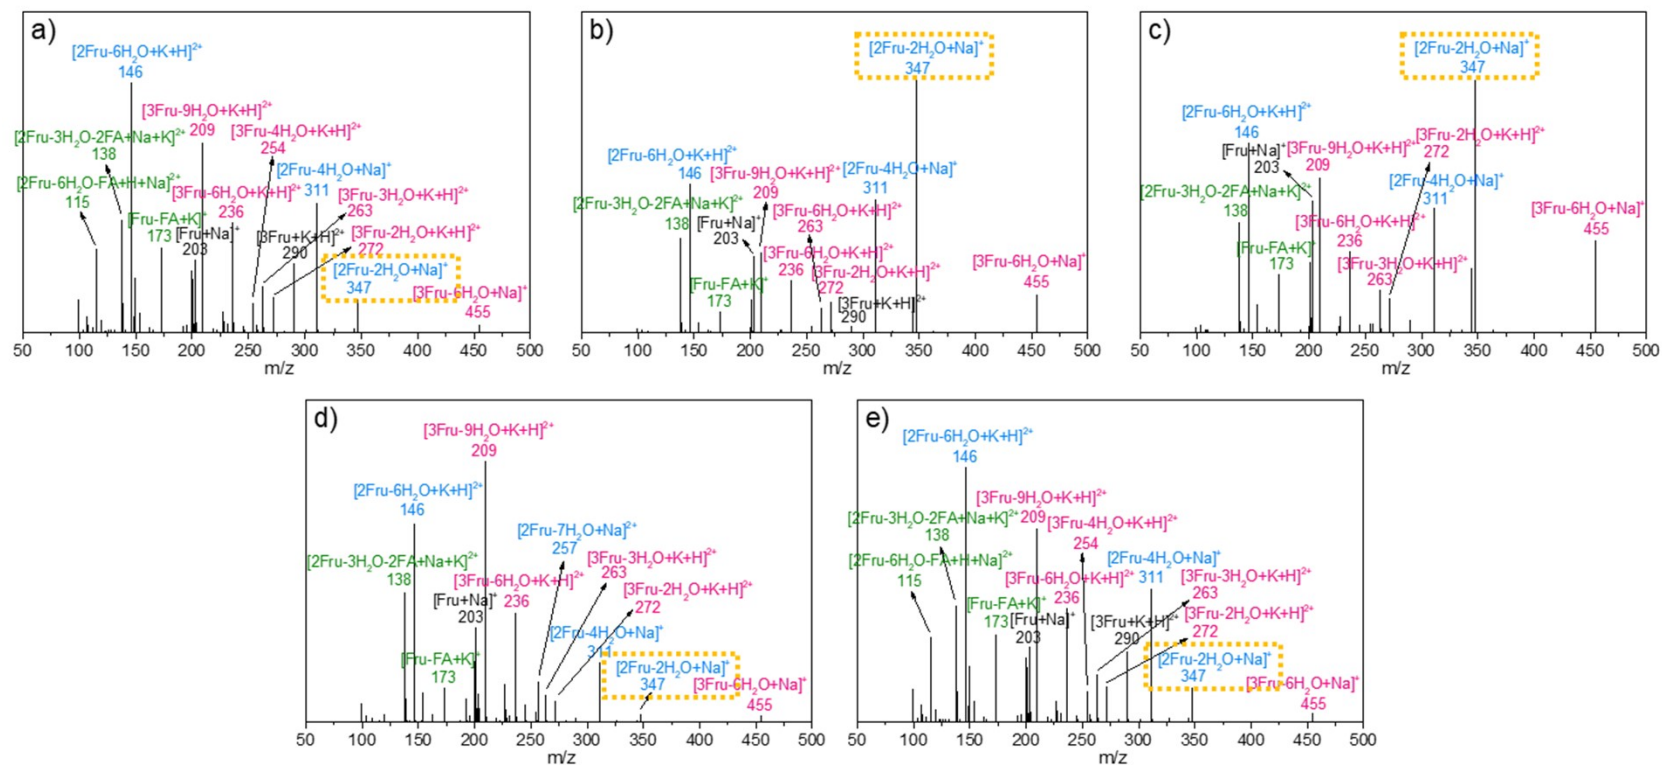

**Fig. S6** ESI-MS spectra of the reaction mixture after reacting fructose (72.0 wt.%) at 140 °C in various solvents for different reaction time. a) H<sub>2</sub>O, 90 min, b) THF-H<sub>2</sub>O (V/V=7/3), 15 min, c) DIO-H<sub>2</sub>O (V/V=7/3), 15 min, d) THF-H<sub>2</sub>O (V/V=7/3), 30 min, and e) DIO-H<sub>2</sub>O (V/V=7/3), 30 min. The yellow dotted squares label the signal of DFAs. Note: the peak with m/z of 115 could also be assigned to [Fru-FA-3H<sub>2</sub>O+HMF+H+Na]<sup>2+</sup> or [2HMF-FA+H+Na]<sup>2+</sup>; the peak with m/z of 138 could also be assigned to [Fru+HMF-2FA+Na+K]<sup>2+</sup>; the peak with m/z of 209 could also be assigned to [2Fru+HMF-6H<sub>2</sub>O+H+K]<sup>2+</sup>, [Fru+2HMF-3H<sub>2</sub>O+H+K]<sup>2+</sup>, or [3HMF+H+K]<sup>2+</sup>; the peak with m/z of 236 could also be assigned to [2Fru+HMF-3H<sub>2</sub>O+H+K]<sup>2+</sup> or [Fru+2HMF+H+K]<sup>2+</sup>; the peak with m/z of 254 could also be assigned to [2Fru+HMF-H<sub>2</sub>O+H+K]<sup>2+</sup>; the peak with m/z of 263 could also be assigned to [2Fru+HMF+H+K]<sup>2+</sup>; the peak with m/z of 272 could also be assigned to [2Fru+HMF+H<sub>2</sub>O+H+K]<sup>2+</sup>; the peak with m/z of 455 could also be assigned to [2Fru+HMF-3H<sub>2</sub>O+Na]<sup>+</sup> or [Fru+2HMF+Na]<sup>+</sup>.

**Table S1.** The pH values of aqueous fructose solutions with various concentrations.<sup>[a]</sup>

| Fructose concentration (wt.%) | pH value |
|-------------------------------|----------|
| -                             | 7.01     |
| 4.5                           | 6.99     |
| 18.0                          | 6.94     |
| 72.0                          | 6.87     |
| 180.0                         | 6.72     |
| 270.0                         | 6.58     |
| 360.0                         | 6.56     |

<sup>[a]</sup> Different amount of fructose was dissolved in water and kept static for 5 h to ensure stable. The pH value was detected by a pen type pH meter (SX-620, Sanxin) at room temperature (20 °C).



**Table S2.** The attribution of characteristic ATR-IR peaks in this study.<sup>1</sup>

| $\nu$ (cm <sup>-1</sup> ) | Assignments <sup>[a]</sup>                                                                                                                                       |
|---------------------------|------------------------------------------------------------------------------------------------------------------------------------------------------------------|
| 781                       | deformation vibrations of skeleton & $\delta$ (C1-O-H) c                                                                                                         |
| 811                       | $\nu$ (O-C2-C3) of $\beta$ -1,3-difuranose<br>deformation vibrations of skeleton & $\delta$ (C6-O-H) c;                                                          |
| 821                       | $\nu$ (C2-C3-C4) & $\delta$ (C3-O-H) f;<br>stretch vibrations of skeleton & $\delta$ (C5-O-H) p                                                                  |
| 870                       | $\delta$ (C2-O-H) & $\nu$ (C2-C3) c                                                                                                                              |
| 921                       | $\delta$ (C1H2) & $\nu$ (C2-O) p<br>deformation vibrations of skeleton & $\delta$ (C6-O-H) c;                                                                    |
| 968                       | stretch vibrations of skeleton & $\delta$ (C2-O-H) & $\delta$ (C4-O-H) f;<br>$\delta$ (C2-O-H) & $\delta$ (C1H2OH) & $\nu$ (C5-C6-O) p<br>$\nu$ (C1-O-H&C6-O) c; |
| 981                       | stretch vibrations of skeleton & $\delta$ (C6-O-H) & $\delta$ (C4-O-H) f;<br>$\nu$ (C3-C4) & $\nu$ (C4-O-H) p                                                    |
| 1017                      | $\nu$ (C5-O-C2) & $\delta$ (C6-O-H) & $\delta$ ((C1)-O-H) f;<br>$\nu$ (C1-O) p<br>$\delta$ (C5-O-H) c;                                                           |
| 1036                      | $\nu$ (C1-O) & $\delta$ (C6)-O-H) f;<br>$\nu$ (C5-O) p                                                                                                           |
| 1064                      | $\nu$ (C1-O) & $\nu$ (C3-O) & $\delta$ (C6)-O-H) c;<br>$\nu$ (C5-O-C2) & $\delta$ (C5)-O-H) & $\delta$ (C1)-O-H) p                                               |
| 1085                      | $\nu$ (C4-C5) & $\delta$ (C5-O-H) & $\delta$ ((C1)-O-H) p<br>$\nu$ (C1-O) & $\nu$ (C3-O-H) & $\delta$ (C4)-O-H) c;                                               |
| 1105                      | $\nu$ (C3-C4) & $\delta$ (C4)-O-H) & $\delta$ (C2)-O-H) f;<br>$\delta$ (C1)-O-H) p<br>$\delta$ (C6)-O-H) c;                                                      |
| 1158                      | $\nu$ (C1-C2) & $\delta$ (C1-H) p<br>$\delta$ (C2)-O-H) c;                                                                                                       |
| 1183                      | $\delta$ (C6)-O-H) f;<br>$\delta$ (C3)-O-H) & $\delta$ (C2)-O-H) p<br>$\delta$ (C3)-O-H) c;                                                                      |
| 1252                      | $\delta$ (C4-O-H) f;<br>$\delta$ (C1-H) & $\omega$ (CH2) & $\omega$ (C4H) p;                                                                                     |

<sup>[a]</sup> f = fructofuranose, p = fructopyranose, c = fructoketose,  $\nu$  = stretching vibration,  $\delta$  = deformation vibrations,  $\omega$  = wagging vibrations.

## References

1. X. Fu, Y. Hu, Y. Zhang, Y. Zhang, D. Tang, L. Zhu and C. Hu, *ChemSusChem*, 2020, 13, 501-512.
